# Supplementary material
Source: PubMed Central journal article supplement (PMC3189302)
Supplement: NIHMS324927-supplement-1_si_001.pdf [file NIHMS324927-supplement-1_si_001.pdf]

Table S1: Mass spectrometric identification of excised gel bands following first-dimensional blue-native PAGE and mass spectrometry

| Protein complex | Mass (kDa) | GenBank accession | ORF           | Protein annotation | Peptides matched | Sequence coverage | Predicted membrane localization |
|-----------------|------------|-------------------|---------------|--------------------|------------------|-------------------|---------------------------------|
| <b>I</b>        | 29         | gi 11496927       | <b>bba15</b>  | OspA               | 17               | 53                | Yes                             |
|                 | 32         | gi 11496910       | <b>bba16</b>  | OspB               | 6                | 23                | Yes                             |
|                 | 18         | gi 11497024       | <b>bbb19</b>  | OspC               | 5                | 23                | Yes                             |
|                 | 28         | gi 11496832       | <b>bbj09</b>  | OspD               | 5                | 27                | Yes                             |
|                 | 68         | gi 15594948       | <b>bb0603</b> | P66                | 12               | 31                | Yes                             |
|                 | 39         | gi 11496856       | <b>bbj34</b>  | HP                 | 7                | 29                | Yes                             |
| <b>II</b>       | 29         | gi 11496927       | <i>bba15</i>  | OspA               | 18               | 59                | Yes                             |
|                 | 32         | gi 11496910       | <i>bba16</i>  | OspB               | 6                | 23                | Yes                             |
|                 | 28         | gi 11496832       | <i>bbj09</i>  | OspD               | 3                | 15                | Yes                             |
|                 | 68         | gi 15594948       | <i>bb0603</i> | P66                | 16               | 38                | Yes                             |
|                 | 39         | gi 11496856       | <i>bbj34</i>  | HP                 | 5                | 25                | Yes                             |
| <b>III</b>      | 29         | gi 11496927       | <i>bba15</i>  | OspA               | 20               | 63                | Yes                             |
|                 | 32         | gi 11496910       | <i>bba16</i>  | OspB               | 6                | 23                | Yes                             |
|                 | 18         | gi 11497024       | <i>bbb19</i>  | OspC               | 3                | 18                | Yes                             |
|                 | 68         | gi 15594948       | <i>bb0603</i> | P66                | 21               | 53                | Yes                             |
|                 | 39         | gi 11496856       | <i>bbj34</i>  | HP                 | 5                | 22                | Yes                             |
|                 | 19         | gi 15594380       | <b>bb0034</b> | P13                | 2                | 9                 | Yes                             |
| <b>IV</b>       | 29         | gi 11496927       | <i>bba15</i>  | OspA               | 22               | 62                | Yes                             |
|                 | 32         | gi 11496910       | <i>bba16</i>  | OspB               | 7                | 23                | Yes                             |
|                 | 18         | gi 11497024       | <i>bbb19</i>  | OspC               | 2                | 11                | Yes                             |
|                 | 28         | gi 11496832       | <i>bbj09</i>  | OspD               | 3                | 19                | Yes                             |
|                 | 68         | gi 15594948       | <i>bb0603</i> | P66                | 30               | 61                | Yes                             |
|                 | 39         | gi 11496856       | <i>bbj34</i>  | HP                 | 4                | 19                | Yes                             |
| <b>V</b>        | 29         | gi 11496927       | <i>bba15</i>  | OspA               | 19               | 60                | Yes                             |
|                 | 32         | gi 11496910       | <i>bba16</i>  | OspB               | 5                | 23                | Yes                             |
|                 | 18         | gi 11497024       | <i>bbb19</i>  | OspC               | 4                | 29                | Yes                             |
|                 | 28         | gi 11496832       | <i>bbj09</i>  | OspD               | 5                | 30                | Yes                             |
|                 | 68         | gi 15594948       | <i>bb0603</i> | P66                | 26               | 57                | Yes                             |
|                 | 19         | gi 15594380       | <i>bb0034</i> | P13                | 2                | 13                | Yes                             |
| <b>VI</b>       | 29         | gi 11496927       | <i>bba15</i>  | OspA               | 21               | 68                | Yes                             |
|                 | 32         | gi 11496910       | <i>bba16</i>  | OspB               | 4                | 13                | Yes                             |
|                 | 18         | gi 11497024       | <i>bbb19</i>  | OspC               | 2                | 11                | Yes                             |
|                 | 28         | gi 11496832       | <i>bbj09</i>  | OspD               | 2                | 12                | Yes                             |
|                 | 68         | gi 15594948       | <i>bb0603</i> | P66                | 27               | 60                | Yes                             |
|                 | 19         | gi 15594380       | <i>bb0034</i> | P13                | 3                | 18                | Yes                             |
| <b>VII</b>      | 8          | gi 11496908       | <b>bba62</b>  | Lp 6.6             | 3                | 38                | Yes                             |
|                 | 29         | gi 11496927       | <i>bba15</i>  | OspA               | 20               | 66                | Yes                             |
|                 | 32         | gi 11496910       | <i>bba16</i>  | OspB               | 6                | 25                | Yes                             |
|                 | 18         | gi 11497024       | <i>bbb19</i>  | OspC               | 3                | 17                | Yes                             |
|                 | 28         | gi 11496832       | <i>bbj09</i>  | OspD               | 4                | 25                | Yes                             |
|                 | 41         | gi 15594580       | <b>bb0235</b> | YchF               | 2                | 7                 | Yes                             |
| <b>VIII</b>     | 19         | gi 15594380       | <i>bb0034</i> | P13                | 5                | 32                | Yes                             |
|                 | 8          | gi 11496908       | <i>bba62</i>  | Lp 6.6             | 2                | 38                | Yes                             |
|                 | 29         | gi 11496927       | <i>bba15</i>  | OspA               | 18               | 65                | Yes                             |
|                 | 32         | gi 11496910       | <i>bba16</i>  | OspB               | 5                | 18                | Yes                             |
|                 | 18         | gi 11497024       | <i>bbb19</i>  | OspC               | 2                | 11                | Yes                             |
|                 | 106        | gi 15595182       | <b>bb0837</b> | UvrA               | 2                | 2                 | Yes                             |

|             |    |             |               |               |    |    |     |
|-------------|----|-------------|---------------|---------------|----|----|-----|
|             | 19 | gi 15594380 | <i>bb0034</i> | P13           | 6  | 37 | Yes |
|             | 22 | gi 15594750 | <b>bb0405</b> | HP            | 3  | 20 | Yes |
| <b>IX</b>   | 29 | gi 11496927 | <i>bba15</i>  | OspA          | 18 | 56 | Yes |
|             | 32 | gi 11496910 | <i>bba16</i>  | OspB          | 4  | 13 | Yes |
|             | 18 | gi 11497024 | <i>bbb19</i>  | OspC          | 3  | 17 | Yes |
|             | 28 | gi 11496832 | <i>bbj09</i>  | OspD          | 7  | 33 | Yes |
|             | 19 | gi 15594380 | <i>bb0034</i> | P13           | 6  | 37 | Yes |
|             | 8  | gi 11496908 | <i>bba62</i>  | Lp 6.6        | 2  | 38 | Yes |
|             | 71 | gi 15594612 | <b>bb0267</b> | HP            | 2  | 4  | No  |
|             | 66 | gi 15595180 | <b>bb0835</b> | CpsG          | 2  | 7  | No  |
|             | 33 | gi 11496904 | <b>bba52</b>  | OMP           | 2  | 9  | Yes |
|             | 51 | gi 15594487 | <b>bb0142</b> | HP            | 3  | 8  | Yes |
| <b>X</b>    | 29 | gi 11496927 | <i>bba15</i>  | OspA          | 26 | 71 | Yes |
|             | 32 | gi 11496910 | <i>bba16</i>  | OspB          | 7  | 28 | Yes |
|             | 18 | gi 11497024 | <i>bbb19</i>  | OspC          | 4  | 23 | Yes |
|             | 28 | gi 11496832 | <i>bbj09</i>  | OspD          | 11 | 46 | Yes |
|             | 19 | gi 15594380 | <i>bb0034</i> | P13           | 6  | 37 | Yes |
|             | 8  | gi 11496908 | <i>bba62</i>  | Lp 6.6        | 4  | 38 | Yes |
|             | 35 | gi 11496730 | <b>bbh37</b>  | HP            | 2  | 13 | Yes |
|             | 22 | gi 15594750 | <i>bb0405</i> | HP            | 3  | 19 | Yes |
|             | 59 | gi 15594898 | <b>bb0553</b> | HP            | 2  | 4  | Yes |
|             | 19 | gi 11496894 | <b>bba03</b>  | OMP           | 2  | 13 | Yes |
|             | 95 | gi 15595172 | <b>bb0827</b> | HrpA          | 2  | 2  | No  |
|             | 36 | gi 15594492 | <b>bb0147</b> | flagellin     | 3  | 11 | No  |
|             | 68 | gi 15594948 | <i>bb0603</i> | P66           | 2  | 3  | Yes |
| <b>MGI</b>  | 29 | gi 11496927 | <i>bba15</i>  | OspA          | 18 | 61 | Yes |
|             | 32 | gi 11496910 | <i>bba16</i>  | OspB          | 6  | 25 | Yes |
|             | 18 | gi 11497024 | <i>bbb19</i>  | OspC          | 4  | 22 | Yes |
|             | 28 | gi 11496832 | <i>bbj09</i>  | OspD          | 10 | 47 | Yes |
|             | 68 | gi 15594948 | <i>bb0603</i> | P66           | 19 | 46 | Yes |
|             | 19 | gi 15594380 | <i>bb0034</i> | P13           | 4  | 28 | Yes |
|             | 8  | gi 11496908 | <i>bba62</i>  | Lp 6.6        | 2  | 38 | Yes |
|             | 35 | gi 11496730 | <i>bbh37</i>  | HP            | 3  | 19 | Yes |
|             | 59 | gi 15594898 | <i>bb0553</i> | HP            | 2  | 9  | Yes |
|             | 36 | gi 15594492 | <i>bb0147</i> | FlaB          | 7  | 26 | No  |
|             | 19 | gi 11496894 | <i>bba03</i>  | OMP           | 4  | 40 | Yes |
|             | 33 | gi 11496762 | <b>bbi39</b>  | HP            | 6  | 26 | Yes |
|             | 22 | gi 15594710 | <b>bb0365</b> | LA 7          | 4  | 25 | Yes |
|             | 10 | gi 15595086 | <b>bb0741</b> | GroES         | 3  | 43 | No  |
|             | 19 | gi 11497061 | <b>bbp38</b>  | ErpA          | 6  | 48 | Yes |
|             | 34 | gi 11496795 | <b>bbk01</b>  | HP            | 4  | 21 | Yes |
|             | 24 | gi 15594888 | <b>bb0543</b> | HP            | 5  | 37 | Yes |
|             | 35 | gi 11496793 | <b>bbk45</b>  | P37, putative | 2  | 9  | Yes |
| <b>MGII</b> | 29 | gi 11496927 | <i>bba15</i>  | OspA          | 23 | 72 | Yes |
|             | 32 | gi 11496910 | <i>bba16</i>  | OspB          | 7  | 30 | Yes |
|             | 18 | gi 11497024 | <i>bbb19</i>  | OspC          | 7  | 35 | Yes |
|             | 28 | gi 11496832 | <i>bbj09</i>  | OspD          | 13 | 53 | Yes |
|             | 19 | gi 15594380 | <i>bb0034</i> | P13           | 5  | 32 | Yes |
|             | 8  | gi 11496908 | <i>bba62</i>  | Lp 6.6        | 5  | 38 | Yes |
|             | 35 | gi 11496730 | <i>bbh37</i>  | HP            | 9  | 37 | Yes |
|             | 22 | gi 15594750 | <i>bb0405</i> | HP            | 5  | 35 | Yes |
|             | 59 | gi 15594898 | <i>bb0553</i> | HP            | 5  | 12 | Yes |
|             | 36 | gi 15594492 | <i>bb0147</i> | FlaB          | 11 | 45 | No  |
|             | 33 | gi 11496762 | <i>bbi39</i>  | HP            | 12 | 35 | Yes |

|  |    |             |                      |               |    |    |     |
|--|----|-------------|----------------------|---------------|----|----|-----|
|  | 24 | gi 15594888 | <i>bb0543</i>        | HP            | 8  | 50 | Yes |
|  | 19 | gi 11496894 | <i>bba03</i>         | OMP           | 9  | 57 | Yes |
|  | 37 | gi 11496783 | <b><i>bbk50</i></b>  | P37           | 3  | 11 | Yes |
|  | 35 | gi 11496793 | <i>bbk45</i>         | P37, putative | 11 | 38 | Yes |
|  | 38 | gi 15594454 | <b><i>bb0108</i></b> | BMP           | 8  | 32 | Yes |
|  | 22 | gi 15594710 | <i>bb0365</i>        | LA 7          | 6  | 49 | Yes |
|  | 32 | gi 11496748 | <b><i>bbi36</i></b>  | antigen P35   | 2  | 37 | Yes |
|  | 39 | gi 15594763 | <b><i>bb0418</i></b> | HP            | 5  | 21 | Yes |
|  | 40 | gi 11496856 | <i>bbj34</i>         | HP            | 6  | 21 | Yes |
|  | 19 | gi 11497061 | <i>bbp38</i>         | ErpA          | 9  | 66 | Yes |
|  | 24 | gi 11496820 | <b><i>bbk19</i></b>  | HP            | 4  | 29 | Yes |
|  | 37 | gi 11496830 | <b><i>bbk47</i></b>  | HP            | 5  | 20 | Yes |
|  | 34 | gi 11496686 | <b><i>bbg01</i></b>  | HP            | 4  | 35 | Yes |
|  | 30 | gi 11496954 | <b><i>bba69</i></b>  | HP            | 4  | 20 | Yes |
|  | 44 | gi 15594668 | <b><i>bb0323</i></b> | HP            | 3  | 10 | Yes |
|  | 37 | gi 15594728 | <b><i>bb0383</i></b> | BmpA          | 3  | 15 | Yes |
|  | 53 | gi 15594450 | <b><i>bb0104</i></b> | HtrA          | 3  | 7  | Yes |
|  | 20 | gi 15594908 | <b><i>bb0563</i></b> | HP            | 2  | 12 | Yes |
|  | 20 | gi 15594907 | <b><i>bb0562</i></b> | HP            | 2  | 22 | Yes |
|  | 27 | gi 15594503 | <b><i>bb0158</i></b> | antigen, S2   | 2  | 9  | Yes |
|  | 23 | gi 11496594 | <b><i>bbd10</i></b>  | HP            | 2  | 16 | Yes |
|  | 27 | gi 11496710 | <b><i>bbh06</i></b>  | HP            | 2  | 16 | Yes |
|  | 27 | gi 15594973 | <b><i>bb0628</i></b> | HP            | 3  | 17 | Yes |
|  | 16 | gi 15595007 | <b><i>bb0662</i></b> | HP            | 2  | 22 | Yes |
|  | 39 | gi 11496858 | <b><i>bbj36</i></b>  | HP            | 2  | 11 | Yes |
|  | 25 | gi 11496772 | <b><i>bbi29</i></b>  | HP            | 2  | 13 | Yes |

List of proteins are identified by Blue-native PAGE mass spectrometry. Compositions of protein complexes (I-X) and monomeric protein groups (MGI-II) are indicated. Designations of the open reading frame (ORF) and annotations are presented according to the JCVI database (<http://www.jcvi.org>). Abbreviations: Osp (outer surface protein), HP (hypothetical protein), Lp (lipoprotein), OMP (Outer membrane protein), Bmp (Basic membrane protein). Signal peptide predictions are derived using PSORT server (<http://psort.ims.u-tokyo.ac.jp/form.html>). First appearance of each subunit is indicated in bold face.

Table S2: Mass spectrometric identification of excised gel bands following second dimensional SDS-PAGE analysis

| Gel band | Mass Theoretical (kDa) | ORF    | Protein annotation | Peptides matched | Sequence coverage (%) | PSORT prediction |
|----------|------------------------|--------|--------------------|------------------|-----------------------|------------------|
| 1        | 68                     | bb0603 | P66                | 14               | 19                    | Yes              |
| 2        | 29                     | bba15  | OspA               | 20               | 10                    | Yes              |
| 3        | 18                     | bbb19  | OspC               | 11               | 49                    | Yes              |
|          | 22                     | bb0405 | HP                 | 2                | 14                    | Yes              |
| 4        | 32                     | bba16  | OspB*              | 4                | 10                    | Yes              |
| 5        | 68                     | bb0603 | P66                | 18               | 33                    | Yes              |
| 6        | 29                     | bba15  | OspA               | 19               | 58                    | Yes              |
| 7        | 18                     | bbb19  | OspC               | 10               | 40                    | Yes              |
|          | 19                     | bb0034 | P13                | 2                | 13                    | Yes              |
| 8        | 32                     | bba16  | OspB*              | 4                | 10                    | Yes              |
| 9        | 29                     | bba15  | OspA               | 21               | 61                    | Yes              |
| 10       | 18                     | bbb19  | OspC               | 11               | 49                    | Yes              |
|          | 22                     | bb0405 | HP                 | 2                | 19                    | Yes              |
|          | 19                     | bb0034 | P13                | 2                | 12                    | Yes              |
| 11       | 32                     | bba16  | OspB*              | 4                | 10                    | Yes              |
| 12       | 29                     | bba15  | OspA               | 21               | 63                    | Yes              |
| 13       | 18                     | bbb19  | OspC               | 14               | 51                    | Yes              |
| 14       | 32                     | bba16  | OspB*              | 6                | 17                    | Yes              |
|          | 22                     | bb0405 | HP                 | 2                | 14                    | Yes              |
| 15       | 29                     | bba15  | OspA               | 21               | 61                    | Yes              |
|          | 32                     | bbi36  | P35, putative      | 2                | 9                     | Yes              |
| 16       | 18                     | bbb19  | OspC               | 13               | 49                    | Yes              |
|          | 22                     | bb0405 | HP                 | 5                | 29                    | Yes              |
|          | 19                     | bbp38  | ErpA               | 6                | 39                    | Yes              |
|          | 19                     | bb0034 | HP                 | 2                | 12                    | Yes              |
|          | 23                     | bbd10  | HP                 | 2                | 10                    | Yes              |
| 17       | 32                     | bba16  | OspB*              | 8                | 23                    | Yes              |
| 18       | 68                     | bb0603 | P66                | 16               | 23                    | Yes              |
|          | 59                     | bb0553 | HP                 | 3                | 34                    | No               |
| 19       | 29                     | bba15  | OspA               | 18               | 57                    | Yes              |
| 20       | 18                     | bbb19  | OspC               | 10               | 48                    | Yes              |
|          | 22                     | bb0365 | LA 7               | 2                | 15                    | Yes              |
|          | 22                     | bb0405 | HP                 | 5                | 32                    | Yes              |
|          | 19                     | bb0034 | P13                | 2                | 12                    | Yes              |
|          | 23                     | bbd10  | HP                 | 4                | 15                    | Yes              |
|          | 21                     | bba24  | DbpA               | 2                | 19                    | Yes              |
|          | 19                     | bbp38  | ErpA               | 3                | 20                    | Yes              |
| 21       | 32                     | bba16  | OspB*              | 5                | 10                    | Yes              |
| 22**     | 67                     | bb0648 | Kinase, putative   | 2                | 6                     | No               |
| 23       | 36                     | bb0147 | FlaB               | 9                | 28                    | No               |
|          | 39                     | bbj36  | HP                 | 6                | 15                    | Yes              |
|          | 39                     | bb0418 | HP                 | 3                | 12                    | Yes              |
|          | 35                     | bbh37  | HP                 | 10               | 25                    | Yes              |

|    |    |        |               |    |    |     |
|----|----|--------|---------------|----|----|-----|
| 24 | 34 | bbk01  | HP            | 21 | 49 | Yes |
|    | 38 | bb0108 | BMP           | 16 | 43 | Yes |
|    | 33 | bbi39  | HP            | 14 | 37 | Yes |
|    | 35 | bbk45  | P37, putative | 8  | 32 | Yes |
|    | 34 | bbg01  | HP            | 4  | 17 | Yes |
| 25 | 29 | bba15  | OspA          | 22 | 66 | Yes |
|    | 29 | bba68  | HP            | 4  | 16 | No  |
| 26 | 28 | bbj09  | OspD          | 7  | 25 | Yes |
|    | 27 | bb0158 | Antigen S2    | 2  | 9  | Yes |
| 27 | 18 | bbb19  | OspC          | 18 | 58 | Yes |
|    | 22 | bb0365 | LA 7          | 5  | 29 | Yes |
|    | 22 | bb0405 | HP            | 11 | 40 | Yes |
|    | 24 | bb0543 | HP            | 4  | 18 | Yes |
|    | 19 | bb0034 | HP            | 2  | 12 | Yes |
|    | 23 | bbd10  | HP            | 5  | 24 | Yes |
|    | 20 | bb0562 | HP            | 2  | 12 | Yes |
|    | 21 | bba24  | DbpA          | 2  | 19 | Yes |
|    | 19 | bbp38  | ErpA          | 2  | 13 | Yes |
| 28 | 23 | bb0739 | HP            | 5  | 22 | No  |
| 29 | 32 | bba16  | OspB*         | 7  | 22 | Yes |
|    | 19 | bba03  | OMP           | 2  | 17 | Yes |
|    | 21 | bb0796 | HP            | 3  | 19 | No  |
| 30 | 8  | bba62  | Lp 6.6        | 2  | 35 | Yes |

List of proteins are identified by blue-native PAGE followed by second dimension SDS-PAGE mass spectrometry. Abbreviations: Osp (outer surface protein), HP (hypothetical protein), Lp (lipoprotein), OMP (Outer membrane protein), Bmp (Basic membrane protein). Designations of the open reading frame (ORF) and annotations are presented according to the JCVI database (<http://www.jcvi.org>). Signal peptide predictions are derived using PSORT server (<http://psort.ims.u-tokyo.ac.jp/form.html>). \* Represented a truncated version of OspB that is known to migrate as a ~19-kDa in current *B. burgdorferi* B31 M1 derived isolate. \*\*Spot 22 represents a 67-kDa protein without potential single peptide and likely reflects a monomeric protein.

Table S3: Proteins Complexes and subunit compositions in wild type *B. burgdorferi*

| Protein complex no. | Mass (kDa) | ORF            | Protein annotation | Peptides matched | Coverage (%) | Predicted membrane localization | Number of predicted membrane spanning regions including amino-terminal signal peptide |
|---------------------|------------|----------------|--------------------|------------------|--------------|---------------------------------|---------------------------------------------------------------------------------------|
| VI                  | 29         | <i>bba15</i>   | OspA               | 21               | 68           | Yes                             | 1                                                                                     |
| VI                  | 32         | <i>bba16</i>   | OspB               | 4                | 13           | Yes                             | 1                                                                                     |
| VI                  | 18         | <i>bbb19</i>   | OspC               | 2                | 11           | Yes                             | 1                                                                                     |
| VI                  | 28         | <i>bbj09</i>   | OspD               | 2                | 12           | Yes                             | 1                                                                                     |
| VI                  | 66         | <i>bb0603</i>  | P66                | 27               | 60           | Yes                             | 6                                                                                     |
| VI                  | 8          | <i>bba62</i>   | Lp 6.6             | 3                | 38           | Yes                             | 1                                                                                     |
| VII                 | 29         | <i>bba15</i>   | OspA               | 20               | 66           | Yes                             | 1                                                                                     |
| VII                 | 32         | <i>bba16</i>   | OspB               | 6                | 25           | Yes                             | 1                                                                                     |
| VII                 | 18         | <i>bbb19</i>   | OspC               | 3                | 17           | Yes                             | 1                                                                                     |
| VII                 | 28         | <i>bbj09</i>   | OspD               | 4                | 25           | Yes                             | 1                                                                                     |
| VII                 | 19         | <i>bb0034</i>  | P13                | 5                | 32           | Yes                             | 5                                                                                     |
| VII                 | 8          | <i>bba62</i>   | Lp 6.6             | 2                | 38           | Yes                             | 1                                                                                     |
| VIII                | 29         | <i>bba15</i>   | OspA               | 18               | 65           | Yes                             | 1                                                                                     |
| VIII                | 32         | <i>bba16</i>   | OspB               | 5                | 18           | Yes                             | 1                                                                                     |
| VIII                | 18         | <i>bbb19</i>   | OspC               | 2                | 11           | Yes                             | 1                                                                                     |
| VIII                | 19         | <i>bb0034</i>  | P13                | 6                | 37           | Yes                             | 5                                                                                     |
| VIII                | 22         | <i>bb0405</i>  | HP                 | 3                | 20           | Yes                             | 4                                                                                     |
| IX                  | 29         | <i>bba15</i>   | OspA               | 18               | 56           | Yes                             | 1                                                                                     |
| IX                  | 32         | <i>bba16</i>   | OspB               | 4                | 13           | Yes                             | 1                                                                                     |
| IX                  | 18         | <i>bbb19</i>   | OspC               | 3                | 17           | Yes                             | 1                                                                                     |
| IX                  | 28         | <i>bbj09</i>   | OspD               | 7                | 33           | Yes                             | 1                                                                                     |
| IX                  | 19         | <i>bb0034</i>  | P13                | 6                | 37           | Yes                             | 5                                                                                     |
| IX                  | 8          | <i>bba62</i>   | Lp 6.6             | 2                | 38           | Yes                             | 1                                                                                     |
| IX                  | 71         | <i>bb0267</i>  | HP                 | 2                | 4            | No                              | 1                                                                                     |
| IX                  | 33         | <i>bba52</i>   | OMP                | 2                | 9            | Yes                             | 1                                                                                     |
| X                   | 29         | <i>bba15</i>   | OspA               | 26               | 71           | Yes                             | 1                                                                                     |
| X                   | 32         | <i>bba16</i>   | OspB               | 7                | 28           | Yes                             | 1                                                                                     |
| X                   | 18         | <i>bbb19</i>   | OspC               | 4                | 23           | Yes                             | 1                                                                                     |
| X                   | 28         | <i>bbj09</i>   | OspD               | 11               | 46           | Yes                             | 1                                                                                     |
| X                   | 19         | <i>bb0034</i>  | P13                | 6                | 37           | Yes                             | 5                                                                                     |
| X                   | 8          | <i>bba62</i>   | Lp 6.6             | 4                | 38           | Yes                             | 1                                                                                     |
| X                   | 22         | <i>bb0405</i>  | HP                 | 3                | 19           | Yes                             | 4                                                                                     |
| MGI                 | 29         | <i>bba15</i>   | OspA               | 18               | 61           | Yes                             | 1                                                                                     |
| MGI                 | 32         | <i>bba16</i>   | OspB               | 6                | 25           | Yes                             | 1                                                                                     |
| MGI                 | 18         | <i>bbb19</i>   | OspC               | 4                | 22           | Yes                             | 1                                                                                     |
| MGI                 | 28         | <i>bbj09</i>   | OspD               | 10               | 47           | Yes                             | 1                                                                                     |
| MGI                 | 66         | <i>*bb0603</i> | P66                | 19               | 46           | Yes                             | 6                                                                                     |
| MGI                 | 19         | <i>bb0034</i>  | P13                | 4                | 28           | Yes                             | 5                                                                                     |
| MGI                 | 8          | <i>bba62</i>   | Lp 6.6             | 2                | 38           | Yes                             | 1                                                                                     |
| MGI                 | 22         | <i>bb0365</i>  | LA 7               | 6                | 49           | Yes                             | 1                                                                                     |
| MGI                 | 59         | <i>*bb0553</i> | HP                 | 2                | 9            | Yes                             | 1                                                                                     |
| MGI                 | 10         | <i>bb0741</i>  | GroES              | 3                | 43           | No                              | 0                                                                                     |
| MGI                 | 19         | <i>bbp38</i>   | ErpA               | 6                | 48           | Yes                             | 1                                                                                     |
| MGII                | 29         | <i>bba15</i>   | OspA               | 23               | 72           | Yes                             | 1                                                                                     |
| MGII                | 32         | <i>bba16</i>   | OspB               | 7                | 30           | Yes                             | 1                                                                                     |
| MGII                | 18         | <i>bbb19</i>   | OspC               | 7                | 35           | Yes                             | 1                                                                                     |
| MGII                | 28         | <i>bbj09</i>   | OspD               | 13               | 53           | Yes                             | 1                                                                                     |

|             |           |               |          |    |    |     |   |
|-------------|-----------|---------------|----------|----|----|-----|---|
| <b>MGII</b> | <b>19</b> | <b>bb0034</b> | P13      | 5  | 32 | Yes | 5 |
| <b>MGII</b> | 8         | <b>bba62</b>  | Lp 6.6   | 5  | 38 | Yes | 1 |
| <b>MGII</b> | 22        | <b>bb0405</b> | HP       | 5  | 35 | Yes | 4 |
| <b>MGII</b> | 35        | <i>bbh37</i>  | HP       | 9  | 37 | Yes | 1 |
| <b>MGII</b> | 36        | <i>bb0147</i> | FlaB     | 11 | 45 | No  | 2 |
| <b>MGII</b> | 33        | <i>bbi39</i>  | HP       | 12 | 35 | Yes | 1 |
| <b>MGII</b> | 24        | <i>bb0543</i> | HP       | 8  | 50 | Yes | 5 |
| <b>MGII</b> | 19        | <i>bba03</i>  | OMP      | 9  | 57 | Yes | 1 |
| <b>MGII</b> | 35        | <i>bbk45</i>  | P37/FlaA | 11 | 38 | Yes | 1 |
| <b>MGII</b> | 38        | <i>bb0108</i> | Bmp      | 8  | 32 | Yes | 1 |
| <b>MGII</b> | 22        | <i>bb0365</i> | La 7     | 6  | 49 | Yes | 1 |
| <b>MGII</b> | 39        | <i>bb0418</i> | HP       | 5  | 21 | Yes | 5 |
| <b>MGII</b> | 19        | <i>bbp38</i>  | ErpA     | 9  | 66 | Yes | 1 |
| <b>MGII</b> | 34        | <i>bbg01</i>  | HP       | 4  | 35 | Yes | 1 |
| <b>MGII</b> | 37        | <i>bb0383</i> | BmpA     | 3  | 15 | Yes | 1 |
| <b>MGII</b> | 20        | <i>bb0562</i> | HP       | 2  | 22 | Yes | 5 |
| <b>MGII</b> | 27        | <i>bb0158</i> | S2       | 2  | 9  | Yes | 1 |
| <b>MGII</b> | 23        | <i>bbd10</i>  | HP       | 2  | 16 | Yes | 1 |
| <b>MGII</b> | 39        | <i>bbj36</i>  | HP       | 2  | 11 | Yes | 3 |

List of proteins are identified by Blue-native PAGE mass spectrometry and further verified by either second dimension SDS-PAGE mass spectrometry and/or immunoblot analysis. Compositions of protein complexes (I-X) and monomeric protein groups (MGI-II) are indicated. Designations of the open reading frame (ORF) and annotations are presented according to the JCVI database (<http://www.jcvi.org>). Abbreviations: Osp (outer surface protein), HP (hypothetical protein), Lp (lipoprotein), OMP (Outer membrane protein), Bmp (Basic membrane protein). Signal peptide predictions are derived using PSORT server (<http://psort.ims.u-tokyo.ac.jp/form.html>). Predictions of transmembrane regions were made using TMPred server ([http://www.ch.embnet.org/software/TMPRED\\_form.html](http://www.ch.embnet.org/software/TMPRED_form.html)). ORF with most ubiquitous distributions in membrane protein complexes are indicated in bold face. \* Based on the molecular weight, P66 or *bb0553* is monomeric in MGI.

Table S4: Proteins Complexes and subunits in *osp* mutant *B. burgdorferi* isolate B314

| Protein complex | Mass (kDa) | ORF            | Protein annotation | Peptides matched | Coverage (%) | Predicted membrane localization | Putative transmembrane regions including signal peptide |
|-----------------|------------|----------------|--------------------|------------------|--------------|---------------------------------|---------------------------------------------------------|
| <b>VI</b>       | 68         | <b>bb0603</b>  | P66                | 48               | 67           | Yes                             | 6                                                       |
|                 | 22         | <b>bbb19</b>   | OspC               | 17               | 53           | Yes                             | 1                                                       |
|                 | 19         | <b>bb0034</b>  | P13                | 2                | 16           | Yes                             | 5                                                       |
| <b>X</b>        | 68         | <i>bb0603</i>  | P66                | 23               | 51           | Yes                             | 6                                                       |
|                 | 22         | <b>bb0406*</b> | CHP                | 3                | 22           | Yes                             | 3                                                       |
|                 | 18         | <i>bbb19</i>   | OspC               | 25               | 58           | Yes                             | 1                                                       |
|                 | 39         | <b>bb0028*</b> | HP                 | 4                | 24           | Yes                             | 2                                                       |
|                 | 94         | <b>bb0795*</b> | OMP                | 2                | 4            | Yes                             | 8                                                       |
|                 | 79         | <b>bb0744*</b> | P83/100            | 12               | 25           | Yes                             | 1                                                       |
|                 | 19         | <i>bb0034</i>  | P13                | 3                | 21           | Yes                             | 5                                                       |
|                 | 22         | <b>bb0405</b>  | HP                 | 7                | 45           | Yes                             | 4                                                       |
| <b>MGI</b>      | 68         | <i>bb0603</i>  | P66                | 13               | 39           | Yes                             | 6                                                       |
|                 | 18         | <i>bbb19</i>   | OspC               | 35               | 67           | Yes                             | 1                                                       |
|                 | 19         | <i>bb0034</i>  | P13                | 8                | 32           | Yes                             | 5                                                       |
|                 | 38         | <b>bb0418</b>  | CHP                | 2                | 9            | Yes                             | 5                                                       |
|                 | 49         | <b>bb0142</b>  | OMP efflux protein | 2                | 7            | Yes                             | 4                                                       |
|                 | 65         | <b>bb0835</b>  | Phosphomannomutase | 2                | 7            | No                              | 2                                                       |
| <b>MGII</b>     | 18         | <i>bbb19</i>   | OspC               | 31               | 62           | Yes                             | 1                                                       |
|                 | 19         | <i>bb0034</i>  | P13                | 5                | 32           | Yes                             | 5                                                       |
|                 | 38         | <i>bb0418</i>  | CHP                | 2                | 9            | Yes                             | 5                                                       |

List of proteins are identified by Blue-native PAGE mass spectrometry and further verified by either second dimension SDS-PAGE mass spectrometry and/or immunoblot analysis. Compositions of protein complexes (VI and X) and monomeric protein groups (MGI-II) are indicated. Abbreviations: Osp (outer surface protein), HP (hypothetical protein), CHP (Conserved hypothetical protein), LP (lipoprotein), OMP (Outer membrane protein). Designations of the open reading frame (ORF), and annotations are presented according to the JCVI database ([www.jcvi.org](http://www.jcvi.org)). \*Proteins that remained absent in Blue-native PAGE mass spectrometric analysis of wild type (Table S1). First appearance of each subunit is indicated in bold face.



Table S5: Proteins Complexes and subunit compositions in Osp mutant 297 isolate

| Protein complex | Mass (kDa)     | ORF             | Protein annotation | Peptides matched | Coverage (%) | Predicted membrane localization | Putative transmembrane regions including signal peptide |
|-----------------|----------------|-----------------|--------------------|------------------|--------------|---------------------------------|---------------------------------------------------------|
| <b>VI</b>       | 42             | <b>bb0323</b> * | HP                 | 8                | 22           | Yes                             | 1                                                       |
|                 | 23             | <b>bbq35</b> *  | MlpJ               | 4                | 26           | Yes                             | 2                                                       |
|                 | 7              | <b>bba62</b>    | Lp6.6              | 2                | 38           | Yes                             | 1                                                       |
|                 | 32             | <b>bbp27</b> *  | RevA1              | 7                | 28           | Yes                             | 1                                                       |
|                 | 14             | <b>bbs26</b> *  | HP                 | 2                | 10           | Yes                             | 1                                                       |
|                 | 24             | <b>bb0543</b>   | HP                 | 6                | 26           | Yes                             | 2                                                       |
|                 | 27             | <b>bb0158</b>   | S2                 | 2                | 9            | Yes                             | 6                                                       |
|                 | 34             | <b>bbp35</b> *  | BppA1              | 12               | 45           | Yes                             | 3                                                       |
|                 | 14             | <b>bb0324</b> * | HP                 | 2                | 21           | Yes                             | 2                                                       |
|                 | 19             | <b>bba01</b> *  | HP                 | 2                | 17           | Yes                             | 3                                                       |
|                 | 23             | <b>bbd10</b>    | HP                 | 5                | 30           | Yes                             | 1                                                       |
|                 | 19             | <b>bb0034</b>   | P13                | 4                | 28           | Yes                             | 5                                                       |
|                 | 40             | <b>bb0028</b>   | HP                 | 2                | 9            | Yes                             | 2                                                       |
|                 | 27             | <b>bb0125</b>   | CHP                | 2                | 9            | Yes                             | 3                                                       |
|                 | 60             | <b>bbi16</b> *  | vraA               | 8                | 22           | Yes                             | 2                                                       |
|                 | 18             | <b>bb0563</b> * | CHP                | 2                | 12           | Yes                             | 5                                                       |
|                 | 95             | <b>bb0795</b>   | OMP                | 16               | 23           | Yes                             | 8                                                       |
|                 | 22             | <b>bb0365</b>   | La7                | 7                | 56           | Yes                             | 1                                                       |
|                 | 26             | <b>bbi29</b>    | HP                 | 10               | 48           | Yes                             | 4                                                       |
|                 | 52             | <b>bb0104</b> * | <i>htrA</i>        | 5                | 13           | Yes                             | 5                                                       |
| 68              | <b>bb0603</b>  | P66             | 3                  | 31               | Yes          | 6                               |                                                         |
| 19              | <b>bbn38</b> * | ErpP            | 5                  | 38               | Yes          | 1                               |                                                         |
| 18              | <b>bba07</b> * | chpAI           | 4                  | 26               | Yes          | 1                               |                                                         |
| <b>IX</b>       | 49             | <b>bb0142</b>   | OMP                | 4                | 12           | Yes                             | 4                                                       |
|                 | 34             | <i>bbp35</i>    | BppA1              | 9                | 41           | Yes                             | 3                                                       |
|                 | 7              | <i>bba62</i>    | Lp6.6              | 2                | 38           | Yes                             | 1                                                       |
|                 | 19             | <i>bb0034</i>   | P13                | 5                | 32           | Yes                             | 5                                                       |
|                 | 44             | <i>bb0323</i>   | HP                 | 2                | 7            | Yes                             | 1                                                       |
|                 | 95             | <i>bb0795</i>   | OMP                | 9                | 10           | Yes                             | 8                                                       |
| <b>IXa</b>      | 7              | <i>bba01</i>    | HP                 | 2                | 38           | Yes                             | 3                                                       |
|                 | 35             | <i>bbp35</i>    | BppA1              | 5                | 25           | Yes                             | 3                                                       |
|                 | 19             | <i>bb0034</i>   | P13                | 2                | 14           | Yes                             | 5                                                       |
| <b>X</b>        | 44             | <i>bb0323</i>   | HP                 | 3                | 11           | Yes                             | 1                                                       |
|                 | 32             | <i>bbp27</i>    | RevA1              | 2                | 11           | Yes                             | 1                                                       |
|                 | 7              | <i>bba62</i>    | Lp6.6              | 2                | 38           | Yes                             | 1                                                       |
|                 | 35             | <i>bbp35</i>    | BppA1              | 9                | 38           | Yes                             | 3                                                       |
|                 | 28             | <b>bba74</b>    | Oms28              | 5                | 23           | Yes                             | 1                                                       |
|                 | 19             | <i>bb0034</i>   | P13                | 2                | 14           | Yes                             | 5                                                       |

List of proteins are identified by blue-native PAGE followed by second dimension SDS-PAGE mass spectrometry. Abbreviations: HP (hypothetical protein), CHP (conserved hypothetical protein), OMP (Outer membrane protein),. Designations of the open reading frame (ORF) and annotations are presented according to the JCVI database (<http://www.jcvi.org>). Signal peptide predictions are derived using PSORT server (<http://psort.ims.u-tokyo.ac.jp/form.html>). Predictions of transmembrane regions were made using TMPred server ([http://www.ch.embnet.org/software/TMPRED\\_form.html](http://www.ch.embnet.org/software/TMPRED_form.html)). \* Proteins that remained absent in Blue-native PAGE mass spectrometric analysis of B31 isolate (Table S1). First appearance of each subunit is indicated in bold face.

Table S6: Oligonucleotide primers used in the study.

| Sequence (5' to 3')                        | Purpose                                                                                                                                            |
|--------------------------------------------|----------------------------------------------------------------------------------------------------------------------------------------------------|
| AGTACTATGACAGATTTTGAC                      | Forward primer for <i>p66</i> qRT-PCR or RT-PCR.                                                                                                   |
| TGCCCAATTCTGTGTTTTTGC                      | Reverse primer for <i>p66</i> qRT-PCR or RT-PCR.                                                                                                   |
| ACTCTTAAAGAAATTAACAG                       | Forward primer for <i>bb0602</i> RT-PCR.                                                                                                           |
| AGCACTATATGTTAACCCCAA                      | Reverse primer for <i>bb0602</i> RT-PCR.                                                                                                           |
| TAGTATTACTAGTTGCATGG                       | Forward primer for <i>bb0604</i> RT-PCR.                                                                                                           |
| AACTATTGTTATTGTCATAG                       | Reverse primer for <i>bb0604</i> RT-PCR.                                                                                                           |
| AAGAATTCTCAAGCG AATCCA<br>TATTTTAC         | Forward primer for amplification of <i>bb0028</i> . The italicized <i>EcoRI</i> site is attached for cloning.                                      |
| AACTCGAGTTATTCTTTAGTTA<br>ATTTTCTGTTTTCCAA | Reverse primer for amplification of <i>bb0028</i> . The italicized <i>XhoI</i> site is attached for cloning.                                       |
| CGGGATCCGAATATTTCAAAT<br>CGGAAGG           | Primer P1, forward primer used to amplify the 3' flanking region to generate the <i>p66</i> mutant. The <i>BamHI</i> site is included for cloning. |
| TCCCCGCGGCAGCAAAGAA<br>GGGCTTTGG           | Primer P2, reverse primer used to amplify the 3' flanking region to generate the <i>p66</i> mutant. The <i>SacII</i> site is included for cloning. |
| GGGGTACCAATTATACCTTCC<br>TGTTGTA           | Primer P3, forward primer used to amplify the 5' flanking region to generate the <i>p66</i> mutant. The <i>KpnI</i> site is included for cloning.  |
| CCGCTCGAGGCATTCCAAC TA<br>ATACTTCC         | Primer P4, reverse primer used to amplify the 5' flanking region to generate the <i>p66</i> mutant. The <i>XhoI</i> site is included for cloning.  |
| AACCTCATAGCGGATCTCAGG                      | Primer P7, forward primer upstream of <i>p66</i> locus used to confirm the deletion of <i>p66</i> .                                                |
| GGTTGCATTTCGATTCCTGTT                      | Primer P5, forward primer used for the detection of insertion of Kanamycin cassette.                                                               |
| ATTCCGACTCGTCCAACATC                       | Primer P6, reverse primer used for the detection of insertion of Kanamycin cassette.                                                               |
| TTGTGTTTACTATTCCCAAG                       | Primer P8, reverse primer downstream of <i>p66</i> used to confirm the deletion of <i>p66</i> .                                                    |
